# Supplementary material for: Comparative studies on the VOC sorption performances over hierarchical and conventional ZSM-5 zeolites
Source: Royal Society of Chemistry journal article supplement (doi:10.1039/d1dt02869c), 2021-01-01
Supplement: d1dt02869c1.pdf [file d1dt02869c1.pdf]

# Supplementary Materials

## Comparative studies on the VOCs sorption performances over hierarchical and conventional ZSM-5 zeolites

Qianxi Tang, Wei Deng, Donghang Chen, Dongqi Liu\* and Limin Guo\*

School of Environmental Science and Engineering, Huazhong University of Science and Technology, Wuhan 430074, China

\*Corresponding authors. *E-mail address:* [liudongqi@hust.edu.cn](mailto:liudongqi@hust.edu.cn) (Dongqi Liu)

[lmguo@hust.edu.cn](mailto:lmguo@hust.edu.cn) (Limin Guo).

**Table S1** Desorption peak temperature (Tp) and binding energy (E) of hexane and toluene over CZ and HZ.

|         |       | CZ                       | HZ             |        |
|---------|-------|--------------------------|----------------|--------|
| Hexane  | Peak2 | 2 K·min <sup>-1</sup>    | - <sup>a</sup> |        |
|         |       | 3 K·min <sup>-1</sup>    | 324            |        |
|         |       | 4 K·min <sup>-1</sup>    | 333            |        |
|         |       | 5 K·min <sup>-1</sup>    | 338            |        |
|         |       | E(kJ·mol <sup>-1</sup> ) | 37.0           | 27.1   |
|         |       | R <sup>2</sup>           | 0.9939         | 0.9710 |
|         |       | <hr/>                    |                |        |
| Hexane  | Peak3 | 2 K·min <sup>-1</sup>    | - <sup>a</sup> |        |
|         |       | 3 K·min <sup>-1</sup>    | - <sup>a</sup> |        |
|         |       | 4 K·min <sup>-1</sup>    | - <sup>a</sup> |        |
|         |       | 5 K·min <sup>-1</sup>    | - <sup>a</sup> |        |
|         |       | E(kJ·mol <sup>-1</sup> ) | 42.1           | -      |
|         |       | R <sup>2</sup>           | 0.9899         | -      |
|         |       | <hr/>                    |                |        |
| Toluene | Peak2 | 0.5 K·min <sup>-1</sup>  | - <sup>a</sup> |        |
|         |       | 1 K·min <sup>-1</sup>    | - <sup>a</sup> |        |
|         |       | 2 K·min <sup>-1</sup>    | - <sup>a</sup> |        |
|         |       | 3 K·min <sup>-1</sup>    | - <sup>a</sup> |        |
|         |       | E(kJ·mol <sup>-1</sup> ) | 38.1           | -      |
|         |       | R <sup>2</sup>           | 0.9899         | -      |
|         |       | <hr/>                    |                |        |

<sup>a</sup>The desorption peak temperature cannot be directly obtained from the TPD profiles due to poor resolution.

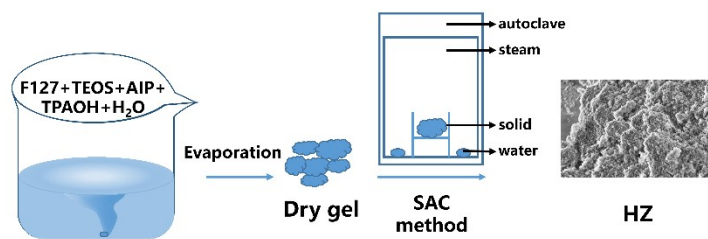

**Fig.S1** Schematic image of HZ procedure.

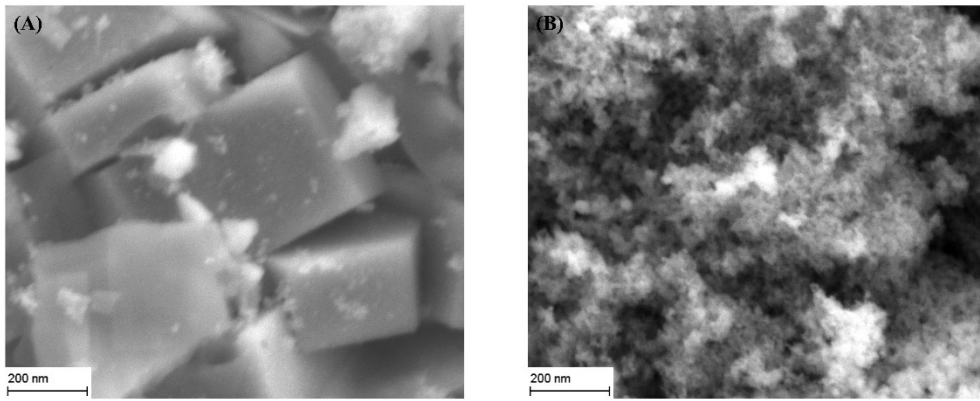

**Fig.S2** SEM images of CZ (A) and HZ (B).

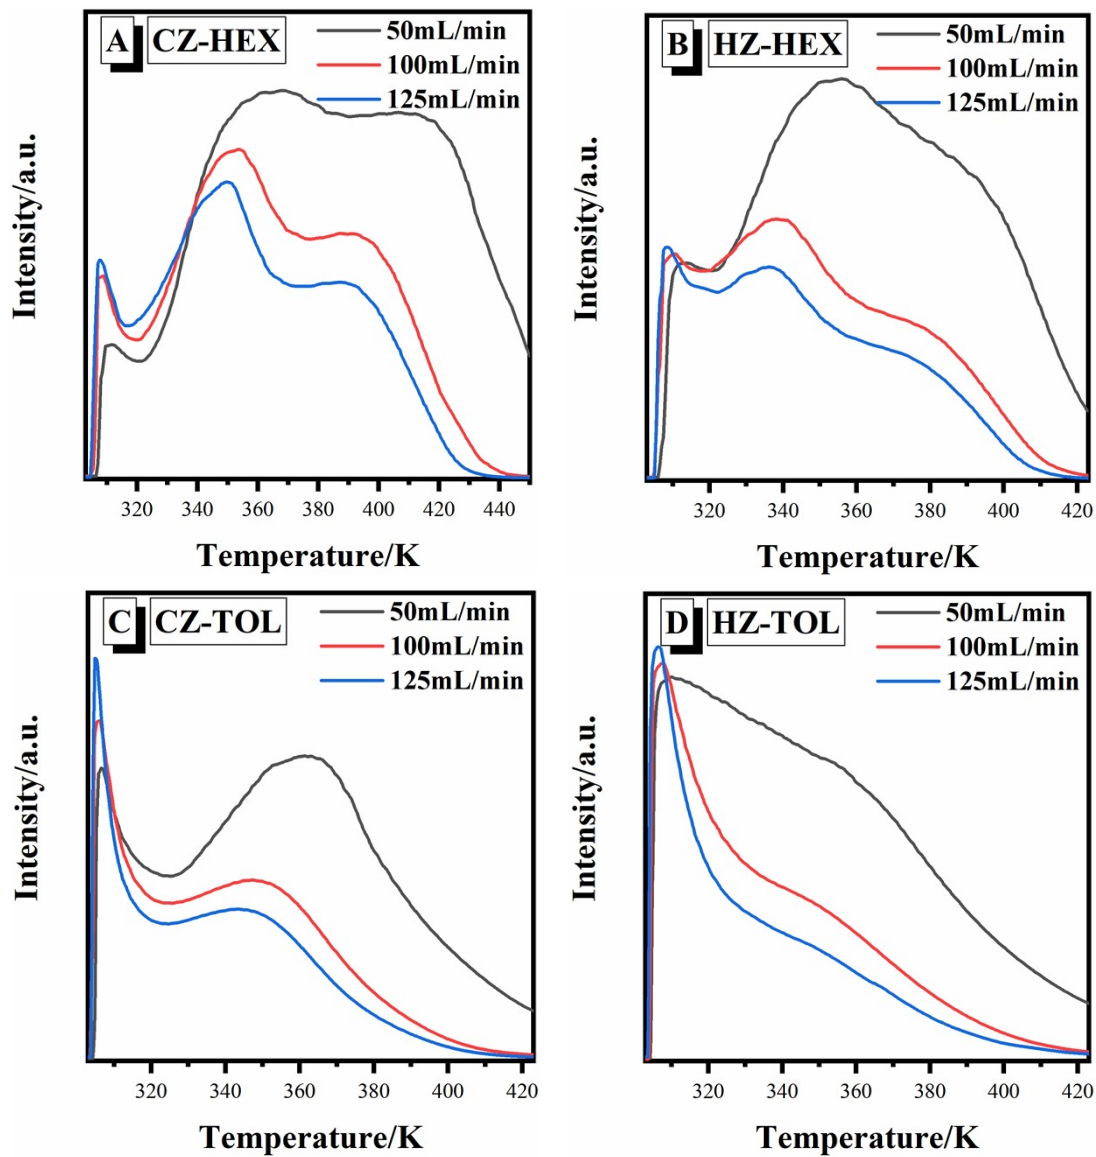

Fig.S3 Temperature-programmed desorption profiles of hexane over CZ (A) and HZ (B) and toluene over CZ (C) and HZ (D) at different gas flow rates (heating rate=5 K·min<sup>-1</sup>).

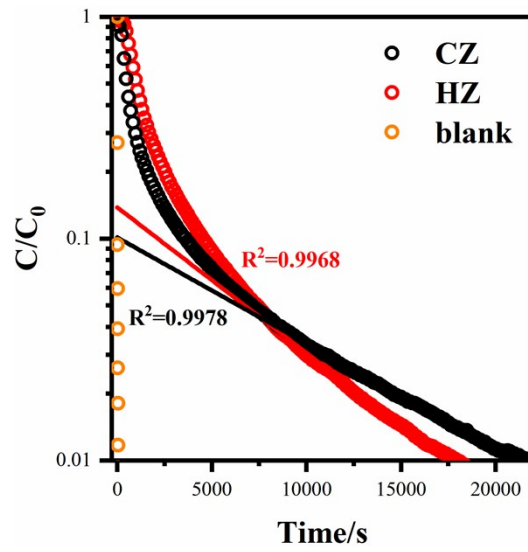

**Fig. S4** Toluene evolution curves (The samples were first saturated with toluene and at time  $t = 0$ , toluene was cut off. And the solid lines were fitted with an exponential).

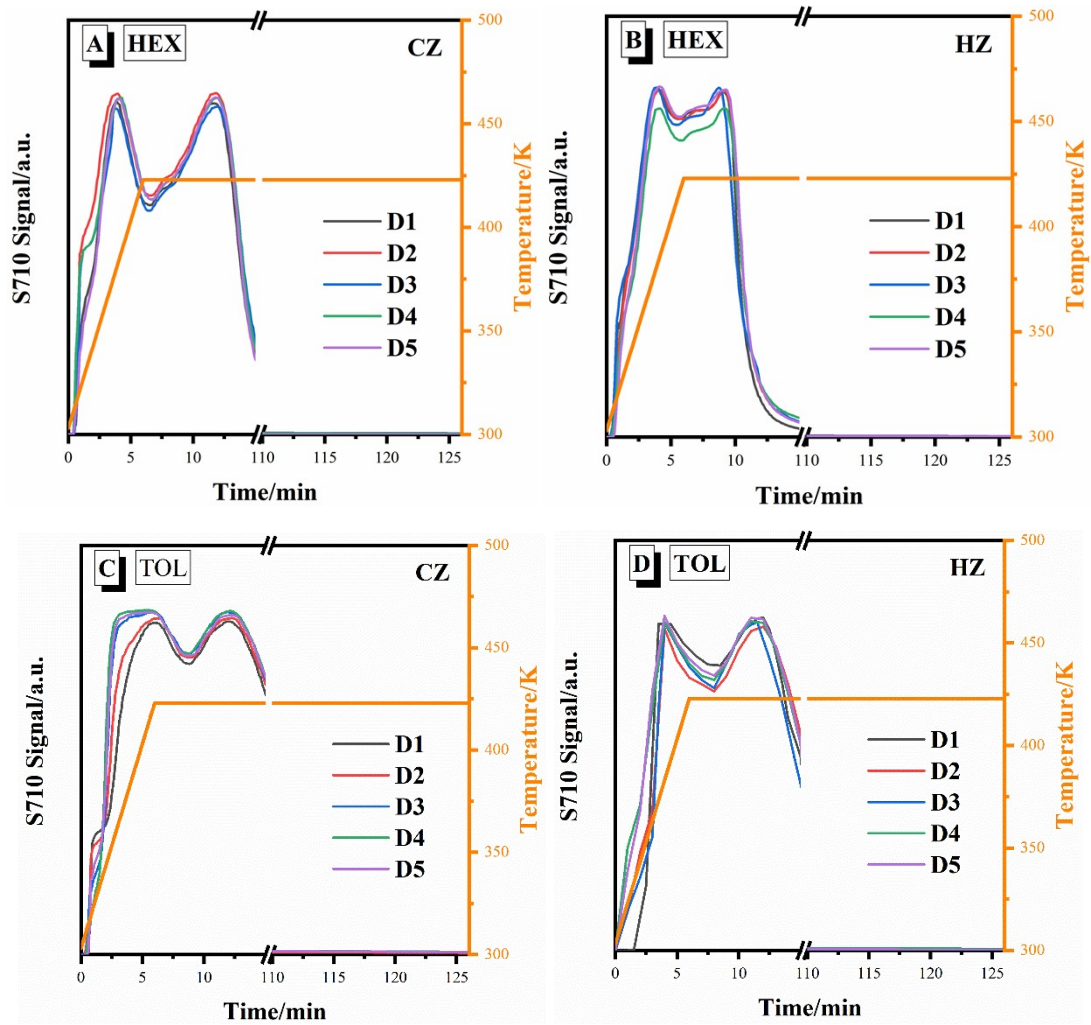

Fig. S5 Desorption curves of hexane over CZ (A) and HZ (B) and toluene over CZ (C) and HZ (D) in cycle adsorption-desorption tests.
